# Supplementary material for: Glutamate induces autophagy via the two-pore channels in neural cells
Source: PubMed Central journal article supplement (PMC5355049; doi:10.18632/oncotarget.14404), 2016-12-31
Supplement: oncotarget-08-12730-s001.pdf [file oncotarget-08-12730-s001.pdf]

# Glutamate induces autophagy via the two-pore channels in neural cells

## Supplementary Materials

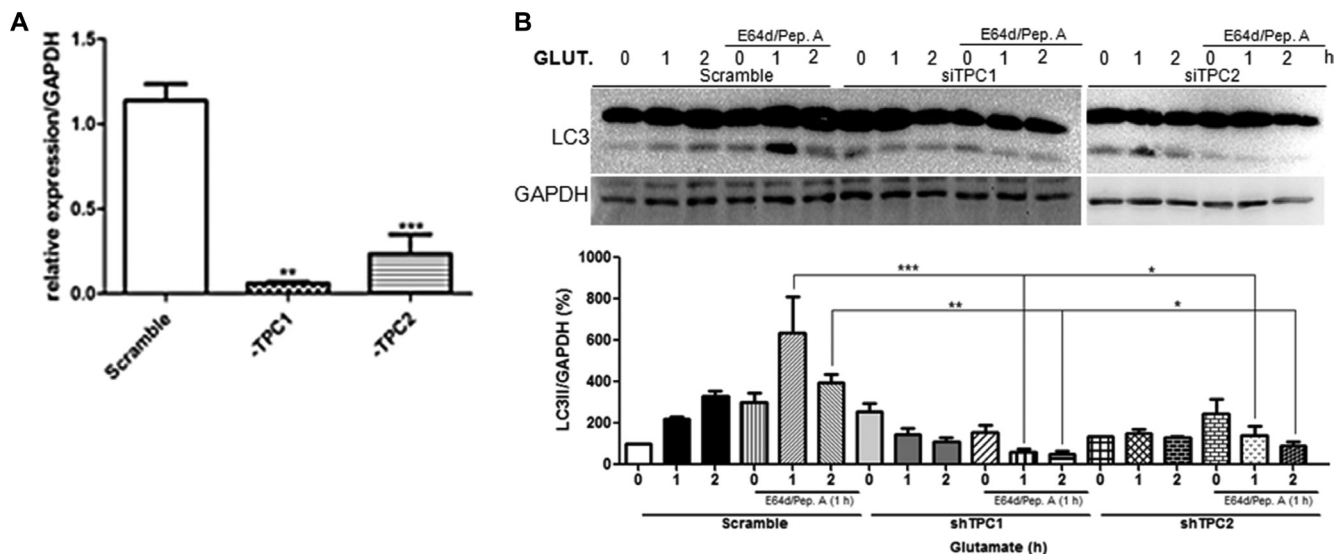

**Supplementary Figure 1: Glutamate induces autophagy through TPC1 and 2 activation in SHSY5Y cells.** The autophagic flux was evaluated in SHSY5Y cells upon downregulation of TPC1 or TPC2 using the specific siRNA oligonucleotide (siTPC1, siTPC2) in relation to control cells transfected with scramble oligonucleotide. **(A)** Analysis of TPC1 and TPC2 levels upon transfection of specific siRNA by real-time PCR. **(B)** LC3 level in SHSY5Y was detected by western blotting in TPC1 or TPC2 silenced cells treated with glutamate (10  $\mu$ M) for 1, 2, 4 h in the presence or absence of the lysosomal inhibitors E64d/pepstatin A (10  $\mu$ g/mL, added 1 h before lysis). Samples were subjected to western blotting using anti-LC3 and anti-GAPDH antibodies. Representative images of LC3-II are shown (upper panels). Graph (lower panel) reports means  $\pm$  s.e.m. of LC3-II levels after GAPDH normalization from three independent experiments; \* $p$  < 0.05, \*\* $p$  < 0.01, \*\*\* $p$  < 0.001. LC3-II levels in control cells were set as 100. (one way ANOVA, followed by Tukey post-test).
